# Supplementary material for: Type II porous ionic liquid based on metal-organic cage that enables L-tryptophan identification
Source: Research Square preprint supplement (doi:10.21203/rs.3.rs-1019974/v1), 2021-11-15
Supplement: Supplementary file 1 [file 362cd485e814fc63c991528b.docx]

Supplementary Information

**Type II porous ionic liquid based on metal-organic cage that enables L-tryptophan identification**

Zhuxiu Zhang1, Baolin Yang1, Bingjie Zhang1, Mifen Cui1, Jihai Tang*1,2, Xu Qiao*1,2

1State Key Laboratory of Materials-Oriented Chemical Engineering,

College of Chemical Engineering, Nanjing Tech University, No. 30 Puzhunan Road,

Nanjing 211816, China.

2Jiangsu National Synergetic Innovation Centre for Advanced Materials (SICAM),

No. 5 Xinmofan Road, Nanjing 210009, China.

E-mail: [jhtang@njtech.edu.cn](mailto:jhtang@njtech.edu.cn), [qct@njtech.edu.cn](mailto:qct@njtech.edu.cn)

**Table of contents:**

[**Supplementary Fig. 1** TGA curves of HD/THTP_Cl and THTP_Cl. 1](#_Toc84881146)

[**Supplementary Fig. 2** Stress versus shear rate plots of HD/THTP_Cl measured at room temperature under rotation mode. 1](#_Toc84881147)

[**Supplementary Fig. 3** Viscosity versus shear rate plots of HD/THTP_Cl measured at room temperature under rotation mode. 2](#_Toc84881148)

[**Supplementary Fig. 4** The number of occupying methane molecules in the HD as a function of time during the production run at 25℃ and 65 bar. 2](#_Toc84881149)

[**Supplementary Fig. 5** L-Phe extraction isotherms of HD/THTP_Cl and THTP_Cl. 3](#_Toc84881150)

[**Supplementary Fig. 6** L-Tyr extraction isotherms of HD/THTP_Cl and THTP_Cl. 3](#_Toc84881151)

[**Supplementary Fig. 7** The simulation box of L-Phe simulation system. Snapshot of empty HD without L-Phe molecule in its cavity. 4](#_Toc84881152)

[**Supplementary Fig. 8** The simulation box of L-Tyr simulation system. Snapshot of empty HD without L-Tyr molecule in its cavity. 4](#_Toc84881153)

[**Supplementary Fig. 9** RMSD for L-Trp simulation system. 5](#_Toc84881154)

[**Supplementary Fig. 10** RMSD for L-Phe simulation system. 5](#_Toc84881155)

[**Supplementary Fig. 11** RMSD for L-Tyr simulation system. 6](#_Toc84881156)

[**Supplementary Fig. 12** Color-filled RDG isosurfaces depicting noncovalent interaction regions of the encapsulated-L-Trp and HD cage. 6](#_Toc84881157)

[**Supplementary Fig. 13** Color-filled RDG isosurfaces depicting noncovalent interaction regions of the absorption of L-Trp by the periphery of HD cages. 7](#_Toc84881158)

[**Supplementary Fig. 14** The van der Walls interactions between the encapsulated-L-Trp and HD cage by the RDG method. 7](#_Toc84881159)

[**Supplementary Fig. 15** Thevan der Walls interactions between the encapsulated-L-Trp and HD cage by the RDG method. 8](#_Toc84881160)

[**Supplementary Fig. 16** TheC-H…π interaction between CH2 group and the benzene ring of ligand. 8](#_Toc84881161)

[**Supplementary Fig. 17** TheN-H…O hydrogen bond between between the nitrogen atom in the indole ring and oxygen atom in the polyoxovanadate. 9](#_Toc84881162)

[**Supplementary Fig. 18** TheweakN-H…O hydrogen bond between between the nitrogen atom in the indole ring and oxygen atom in the polyoxovanadate. 9](#_Toc84881163)

[**Supplementary Fig. 19** TheweakN-H…O hydrogen bond between between the nitrogen atom in the indole ring and oxygen atom in the polyoxovanadate. 9](#_Toc84881164)

[**Supplementary Fig. 20** TheweakN-H…O hydrogen bond between between the nitrogen atom in the indole ring and oxygen atom in the polyoxovanadate. 10](#_Toc84881165)

[**Supplementary Fig. 21** Calibration curve for the determination of L-Trp. 10](#_Toc84881166)

[**Supplementary Fig. 22** Calibration curve for the determination of L-Phe. 11](#_Toc84881167)

[**Supplementary Fig. 23** Calibration curve for the determination of L-Tyr. 11](#_Toc84881168)

[**Supplementary Fig. 24** 1H NMR of the white precipitate (D2O, 400 MHz, 298 K). 12](#_Toc84881169)

[**Supplementary Table 1** RMSD values obtained from the MD simulations. 13](#_Toc84881170)


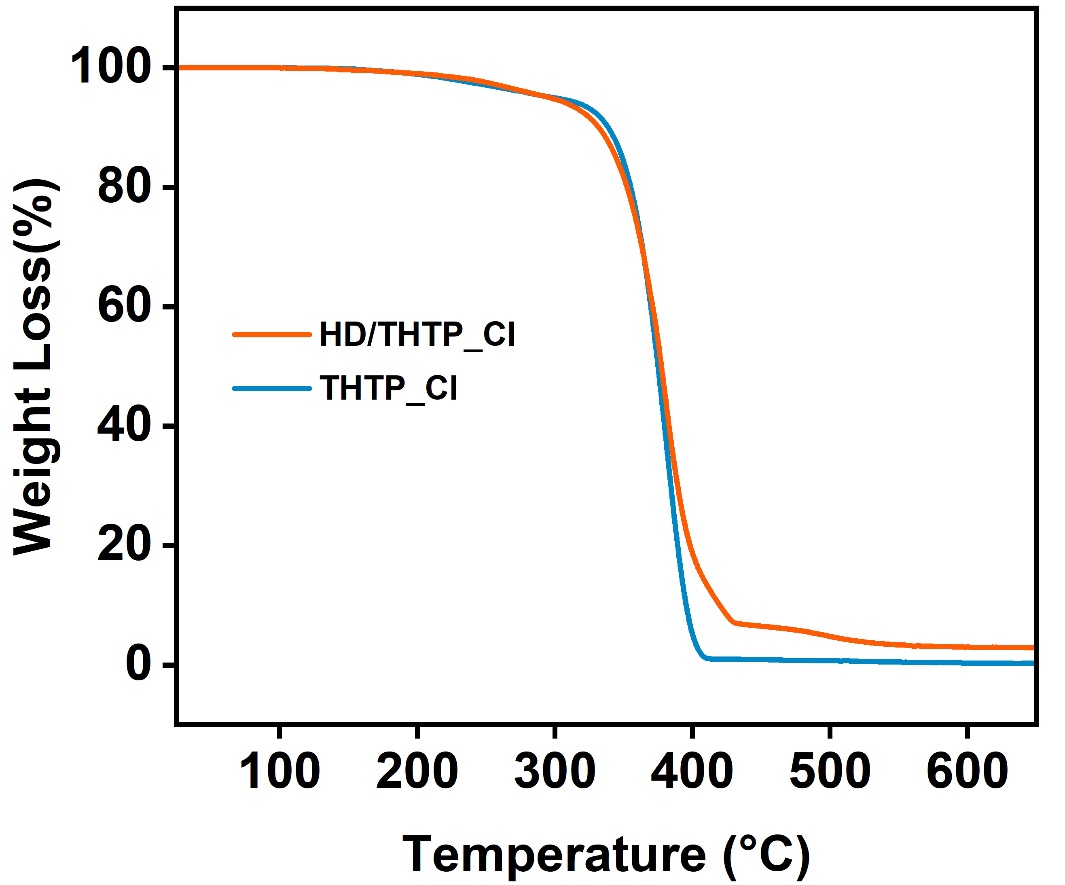


**Supplementary Fig. 1** TGA curves of HD/THTP_Cl and THTP_Cl.


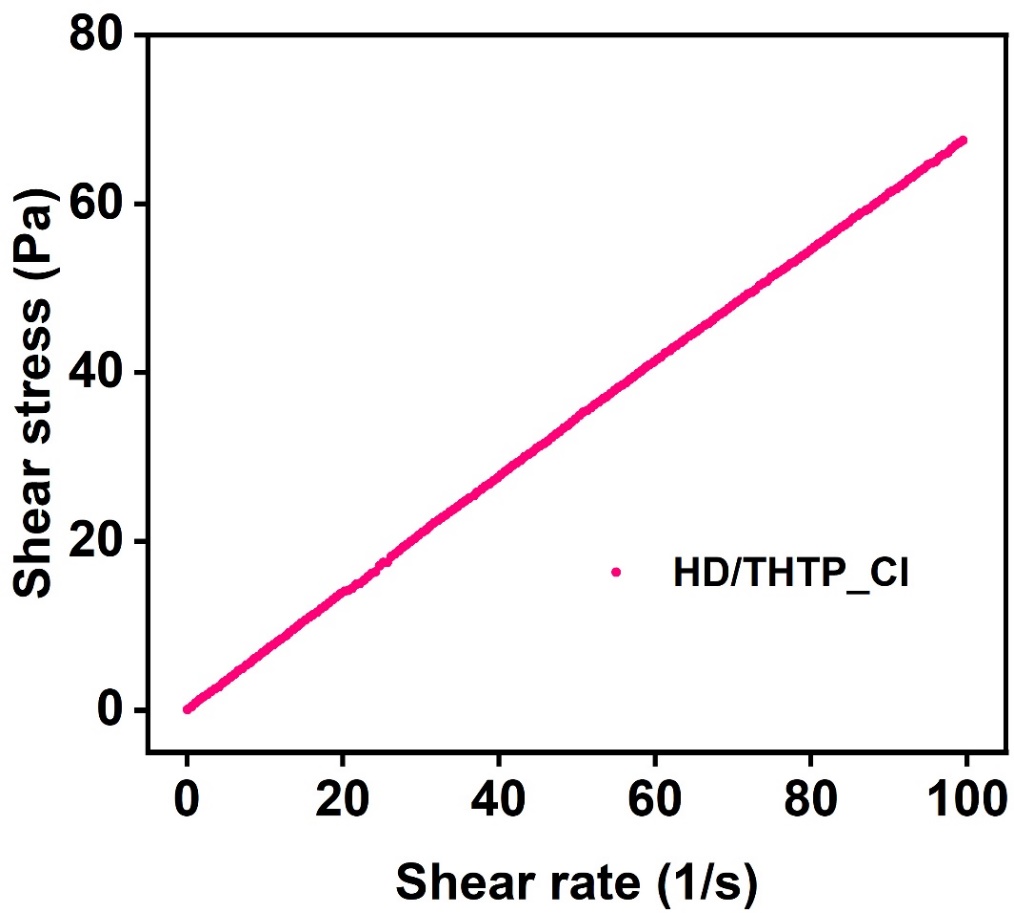


**Supplementary Fig. 2** Stress versus shear rate plots of HD/THTP_Cl measured at room temperature under rotation mode.


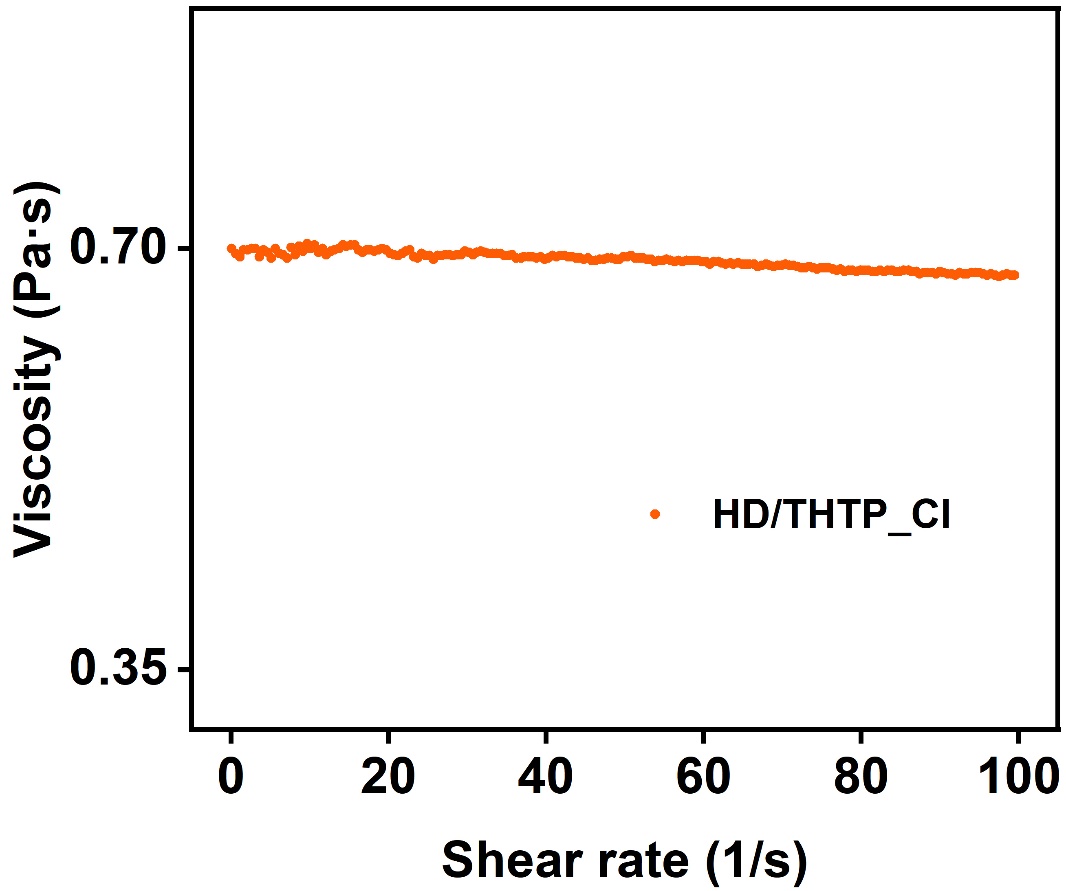


**Supplementary Fig. 3** Viscosity versus shear rate plots of HD/THTP_Cl measured at room temperature under rotation mode.


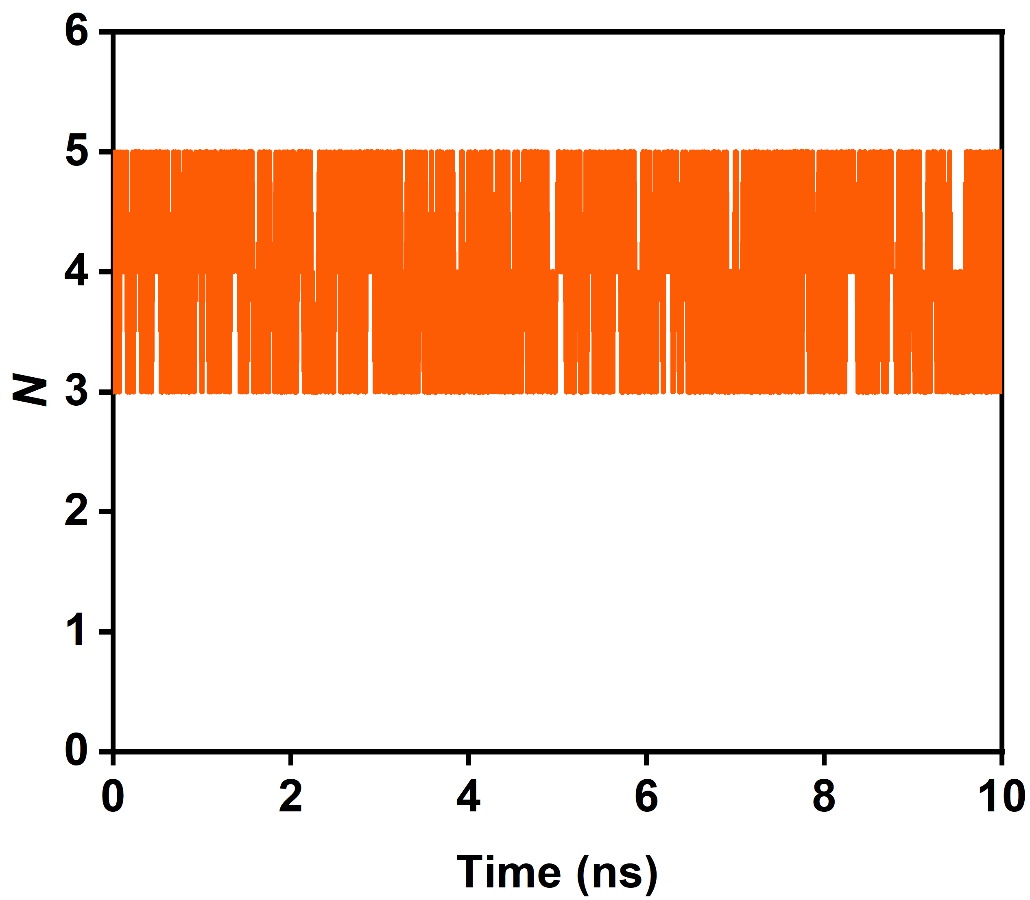


**Supplementary Fig. 4** The number of occupying methane molecules in the HD as a function of time during the production run at 25℃ and 65 bar.


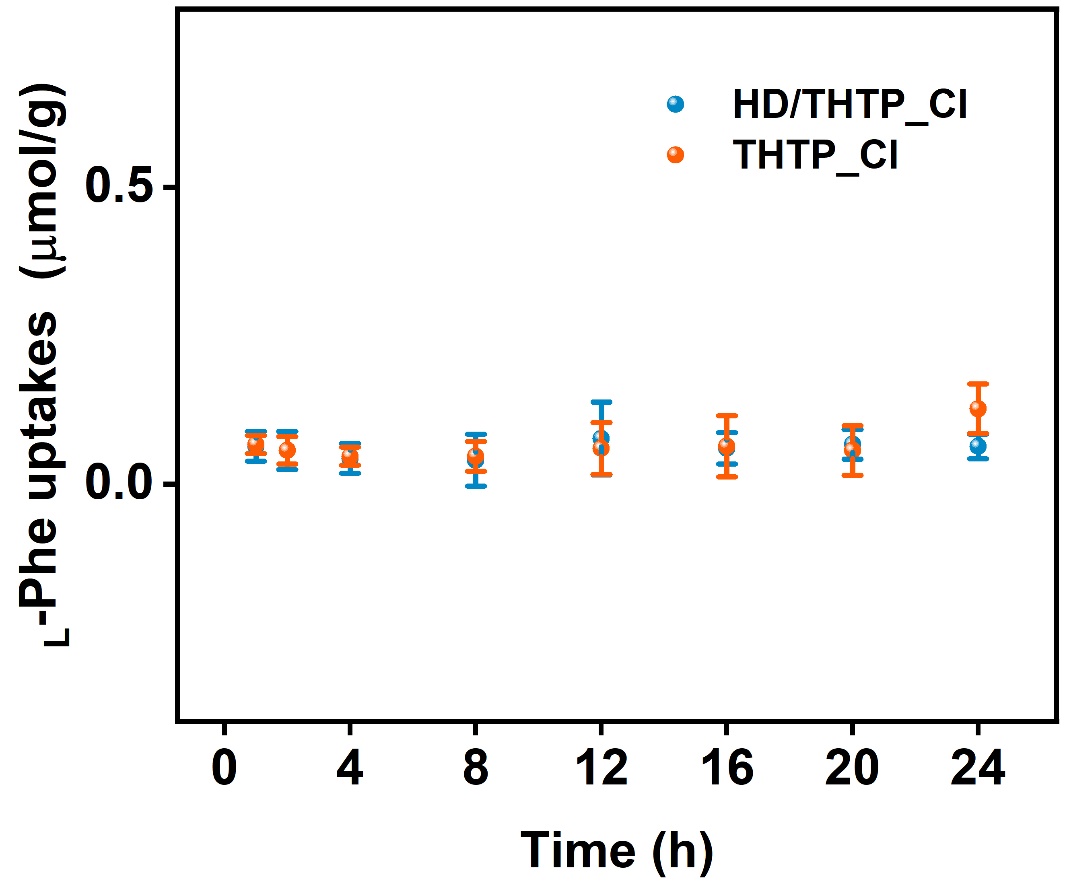


**Supplementary Fig. 5** L-Phe extraction isotherms of HD/THTP_Cl and THTP_Cl.


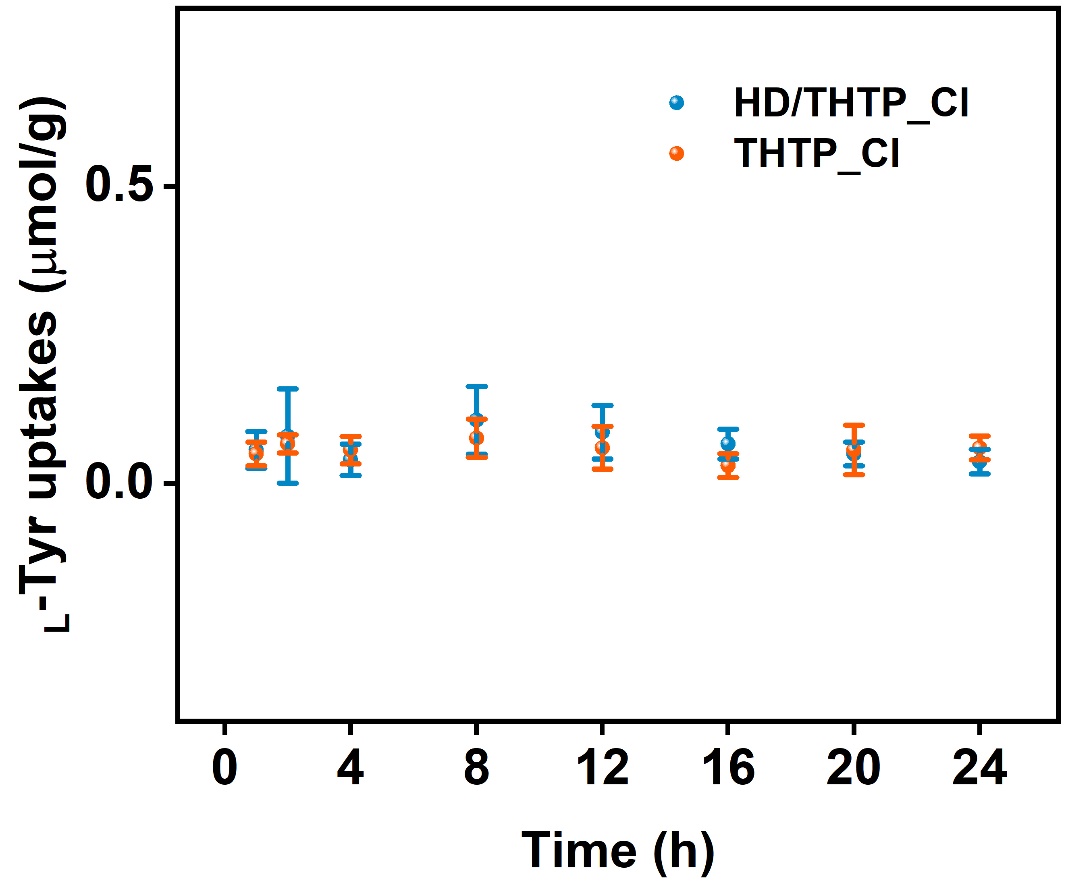


**Supplementary Fig. 6** L-Tyr extraction isotherms of HD/THTP_Cl and THTP_Cl.


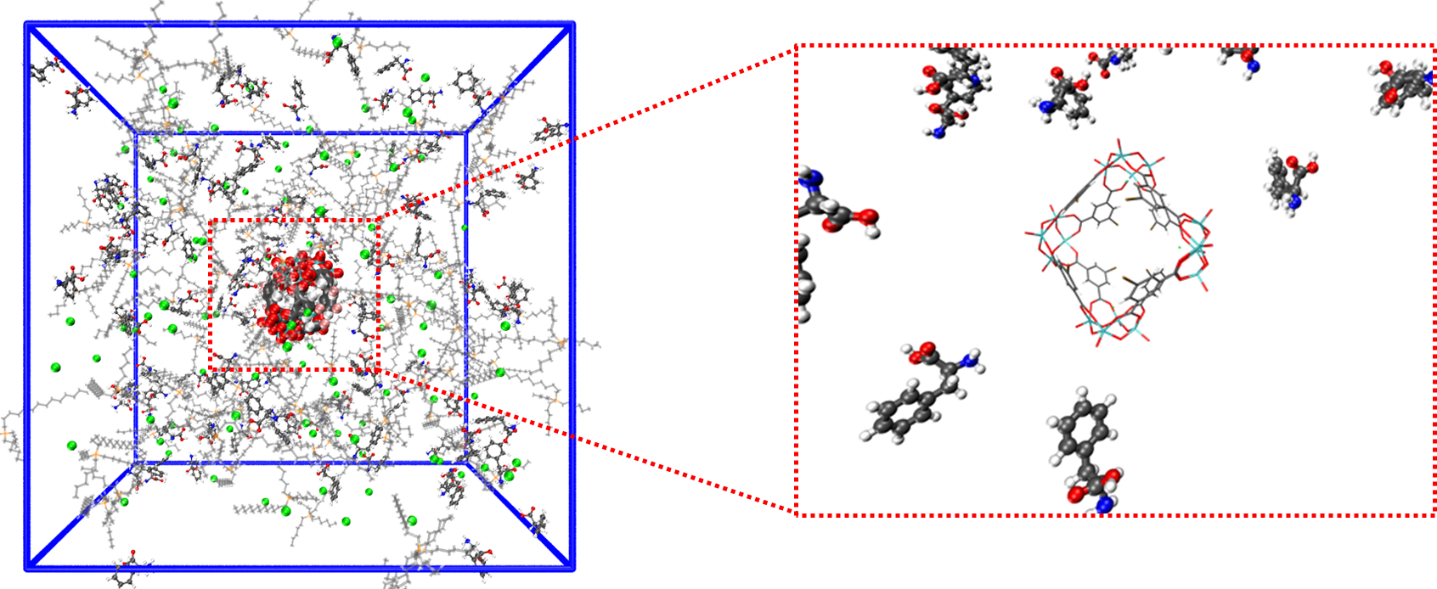


**Supplementary Fig. 7** The simulation box of L-Phe simulation system. Snapshot of empty HD without L-Phe molecule in its cavity.


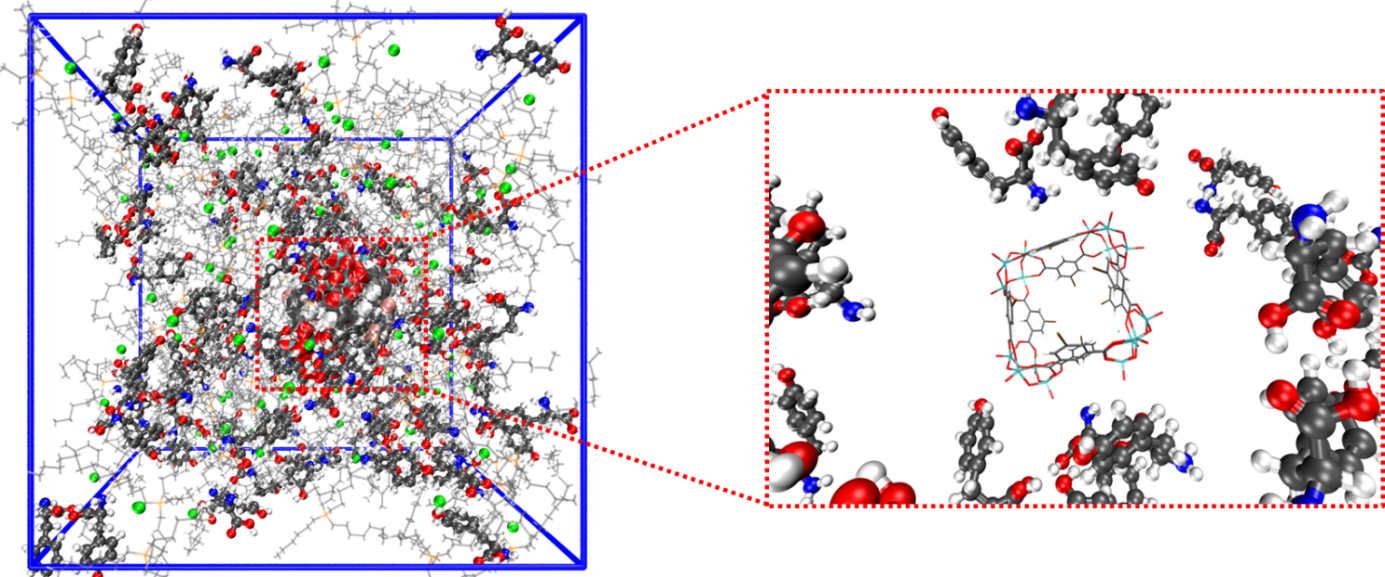


**Supplementary Fig. 8** The simulation box of L-Tyr simulation system. Snapshot of empty HD without L-Tyr molecule in its cavity.


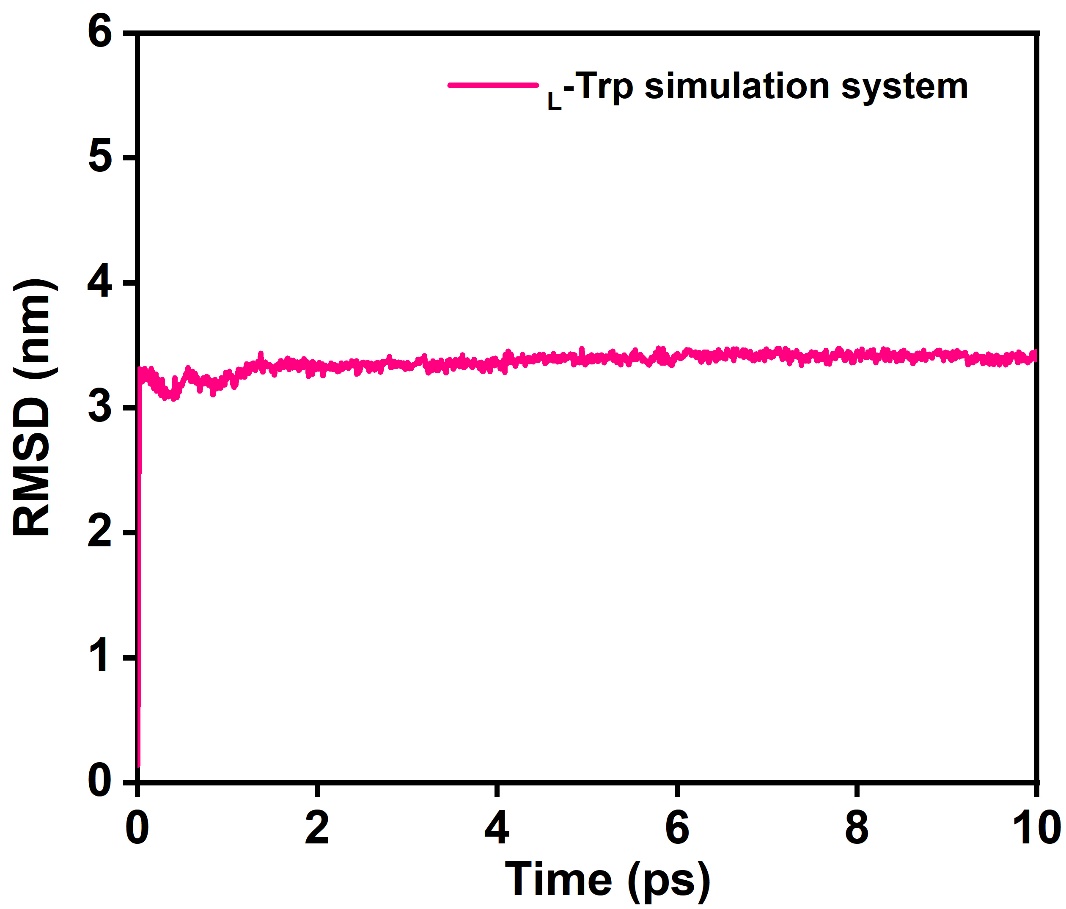


**Supplementary Fig. 9** RMSD for L-Trp simulation system.


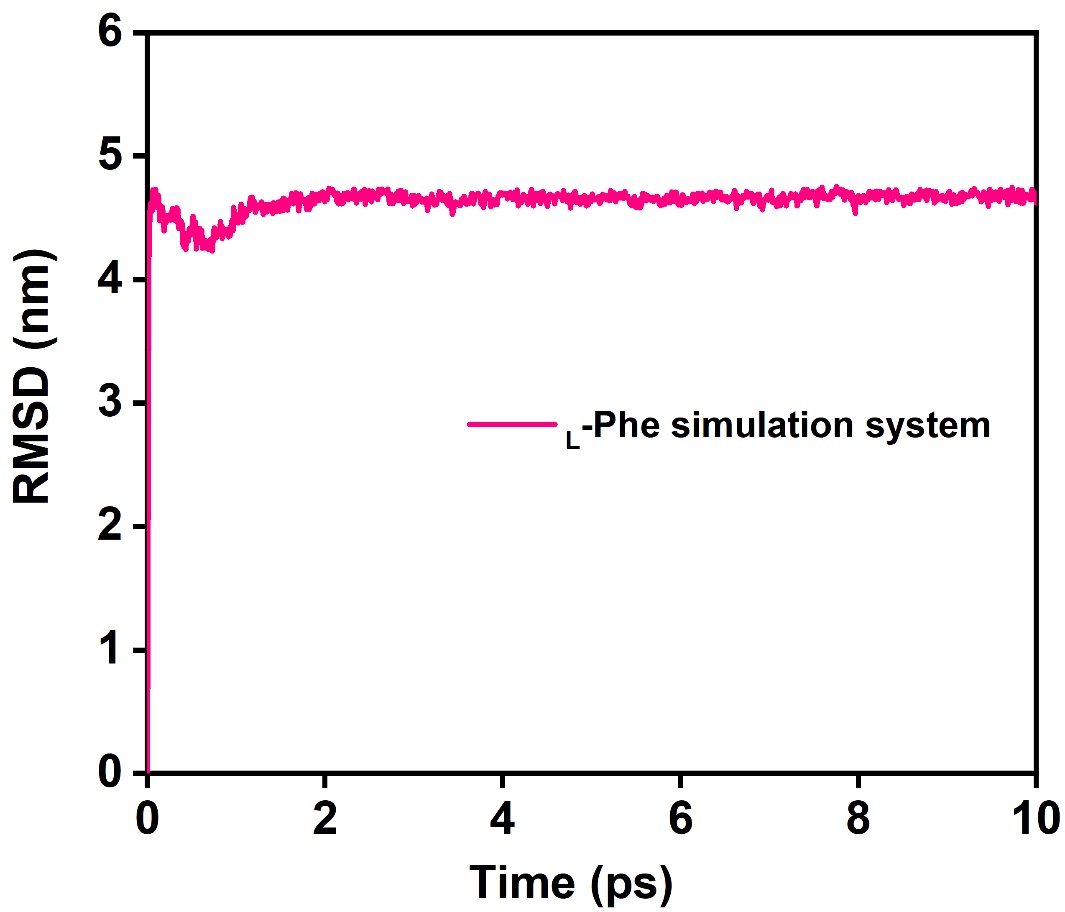


**Supplementary Fig. 10** RMSD for L-Phe simulation system.


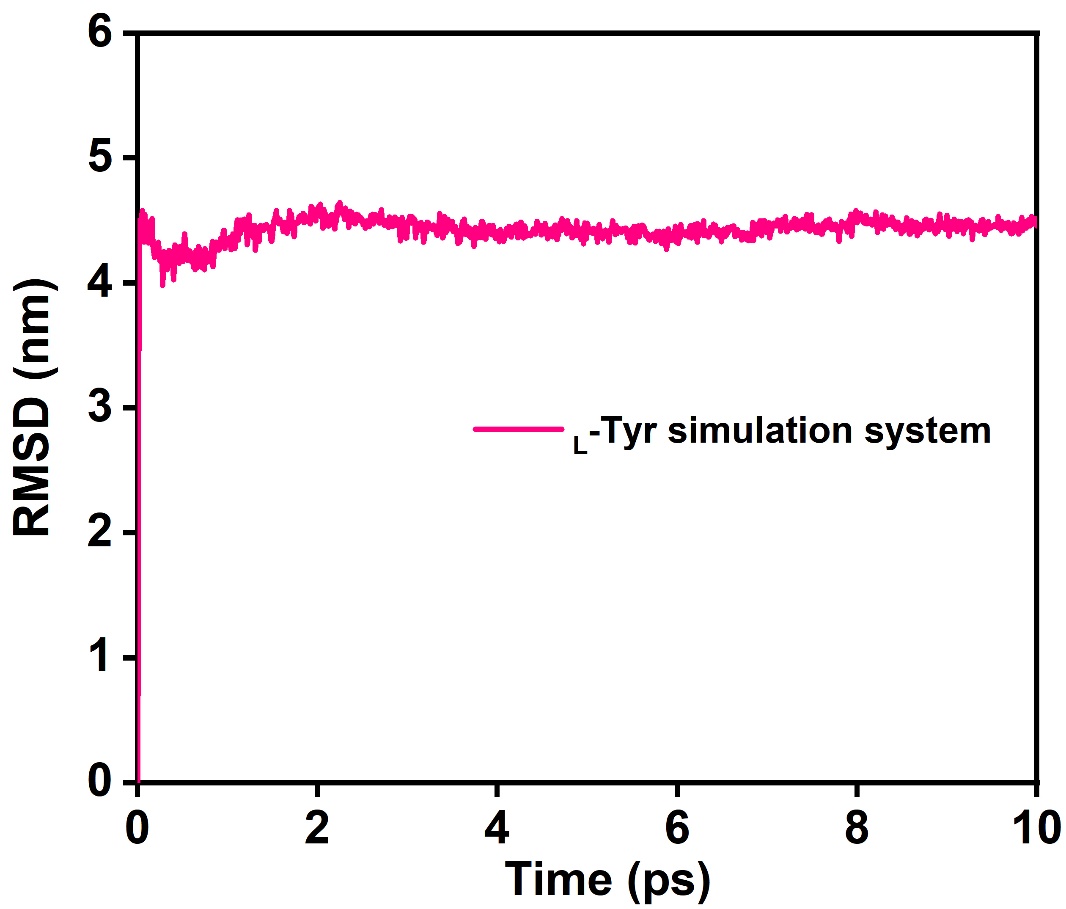


**Supplementary Fig. 11** RMSD for L-Tyr simulation system.


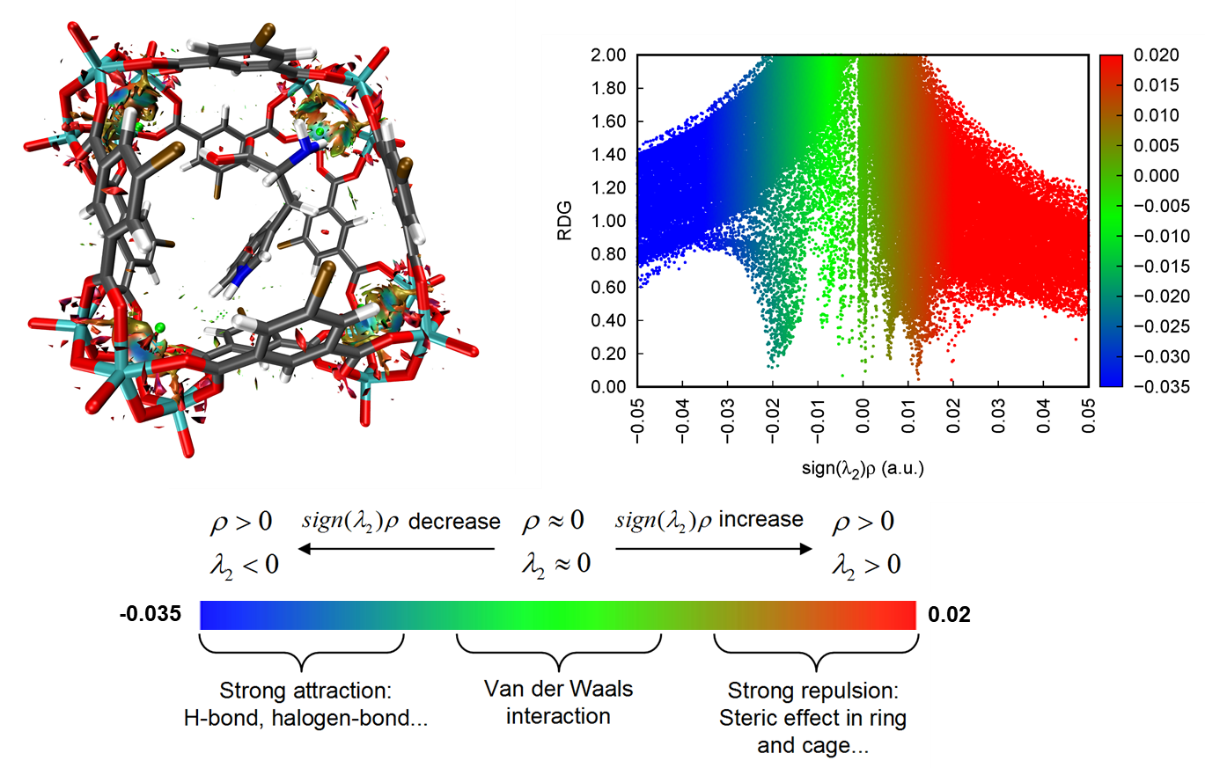


**Supplementary Fig. 12** Color-filled RDG isosurfaces depicting noncovalent interaction regions of the encapsulated-L-Trp and HD cage. The blue, green, and red clouds represent hydrogen bonding, van der Waals interactions, and steric hindrance, respectively.


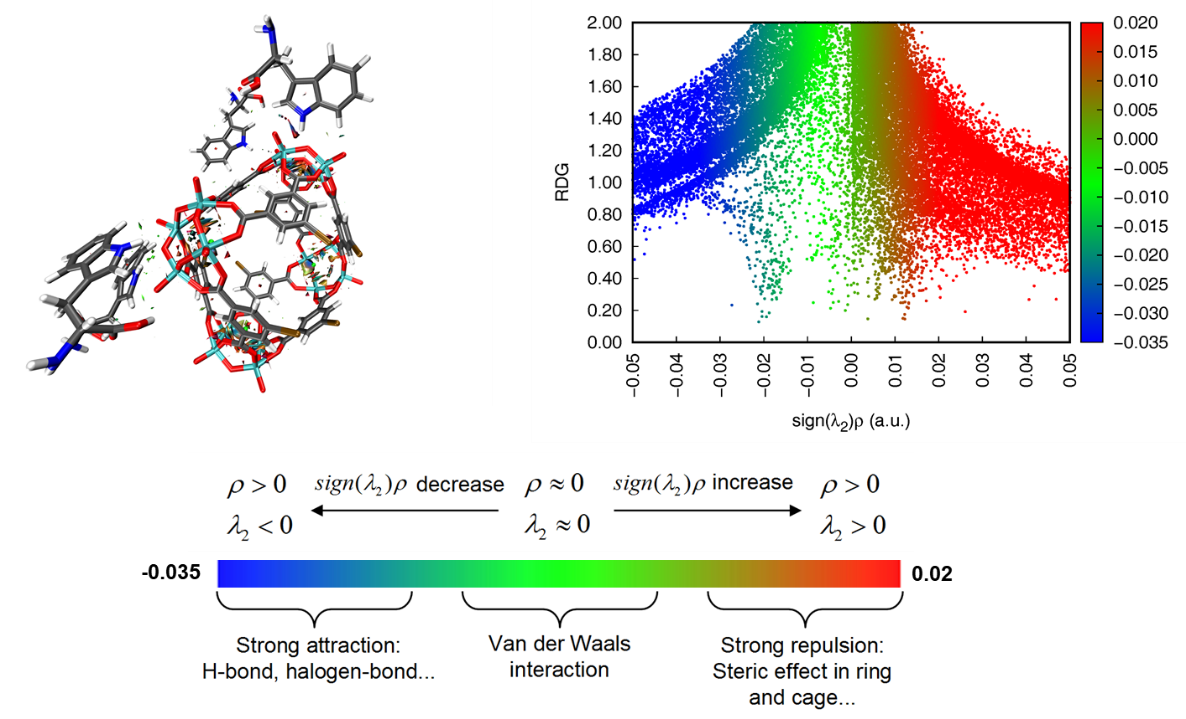


**Supplementary Fig. 13** Color-filled RDG isosurfaces depicting noncovalent interaction regions of the absorption of L-Trp by the periphery of HD cages. The blue, green, and red clouds represent hydrogen bonding, van der Waals interactions, and steric hindrance, respectively.


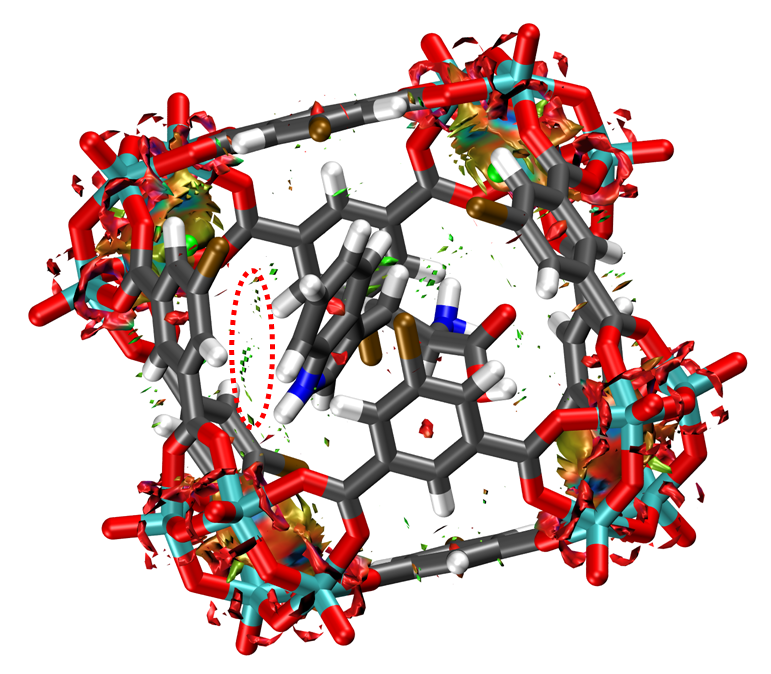


**Supplementary Fig. 14** The van der Walls interactions between the encapsulated-L-Trp and HD cage by the RDG method.


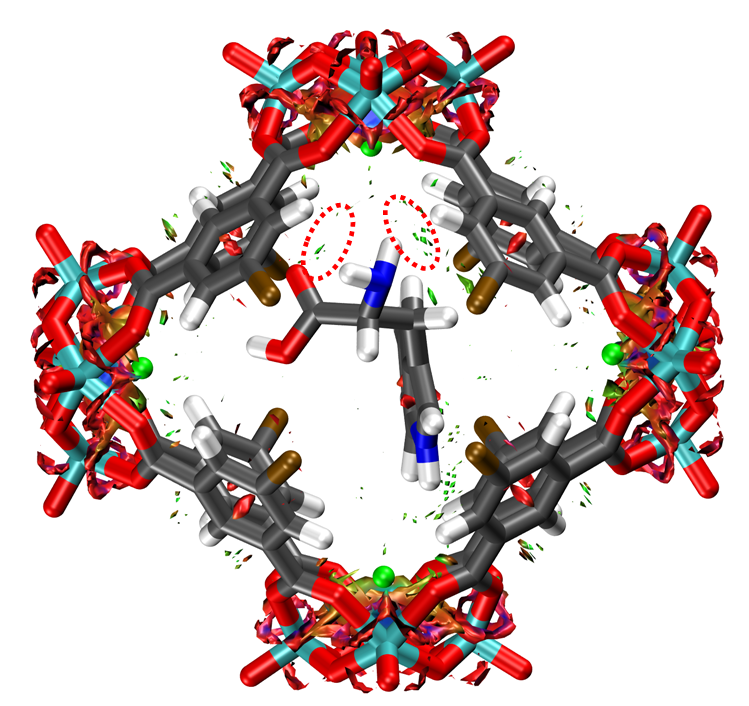


**Supplementary Fig. 15** Thevan der Walls interactions between the encapsulated-L-Trp and HD cage by the RDG method.


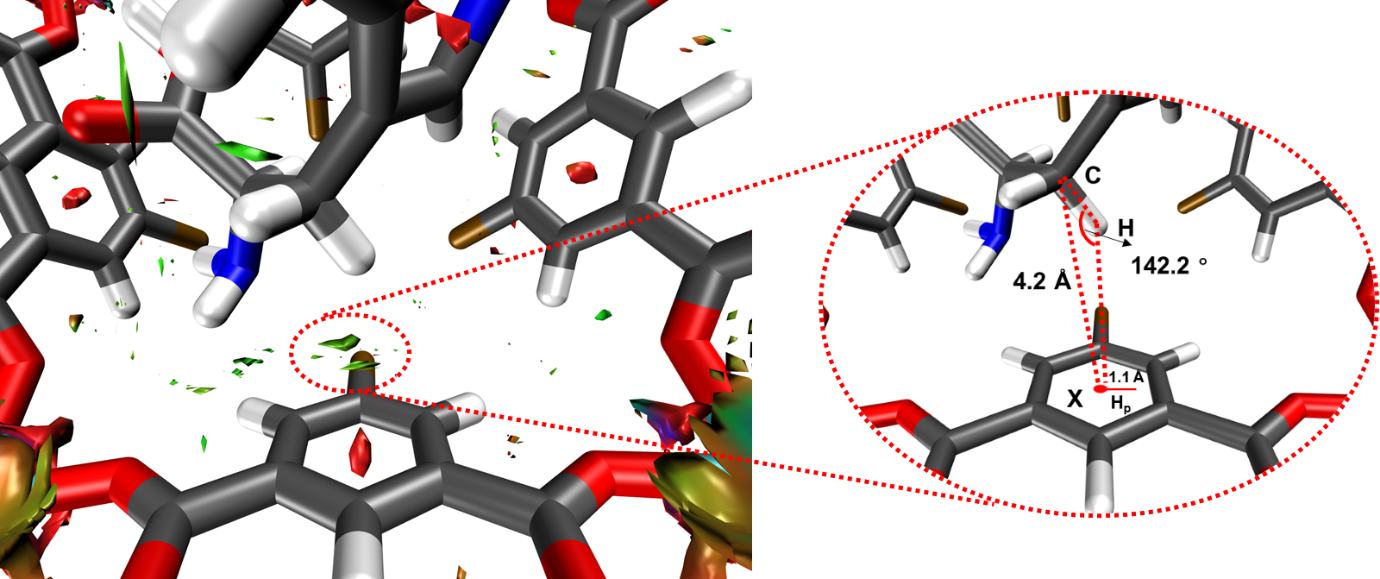


**Supplementary Fig. 16** TheC-H…π interaction between CH2 group and the benzene ring of ligand. Geometric parameters are measured according to the Brandl-Weiss system for defining C-H…π interaction: (1) the distance between the donor carbon and the ring centroid of the aromatic system (dC–X ≤ 4.5 Å), (2) the angle formed by the donor carbon, hydrogen and ring centroid (∠C–H–X ≥ 120°), (3) the distance of the vertical projection of the donor H-atom onto the acceptor π system from the geometric center of the aromatic system (dHp–X = 1–1.2 Å).


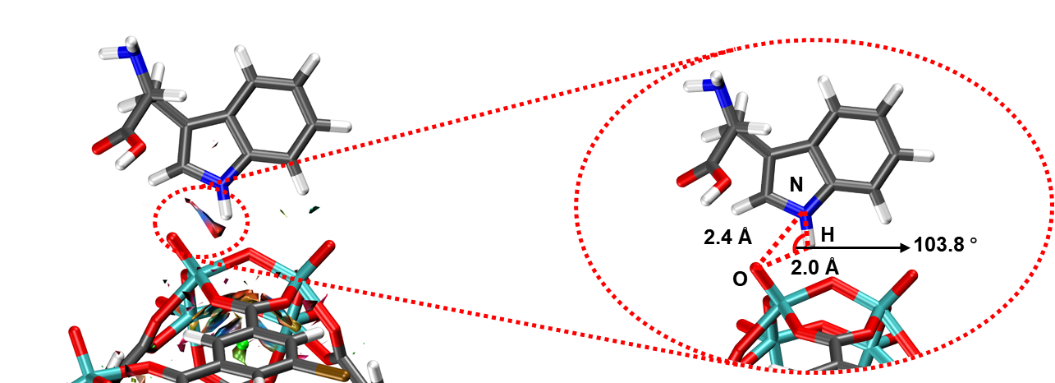


**Supplementary Fig. 17** TheN-H…O hydrogen bond between between the nitrogen atom in the indole ring and oxygen atom in the polyoxovanadate.


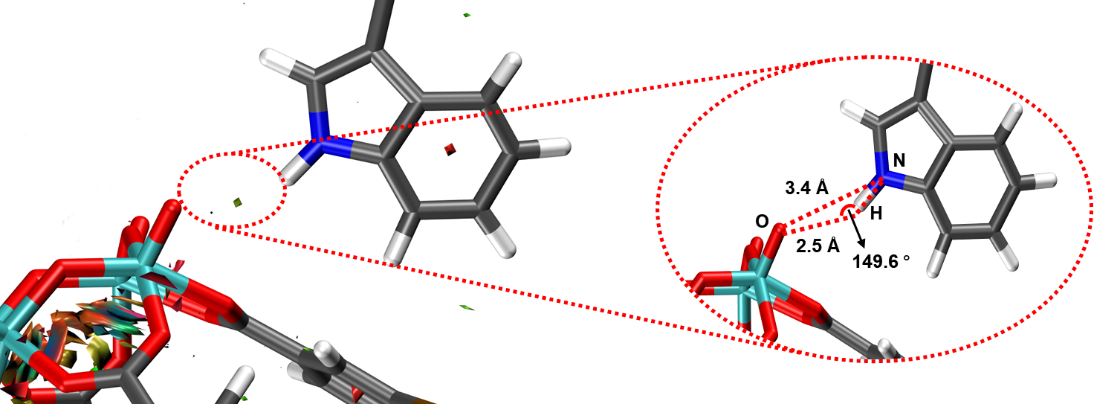


**Supplementary Fig. 18** TheweakN-H…O hydrogen bond between between the nitrogen atom in the indole ring and oxygen atom in the polyoxovanadate.


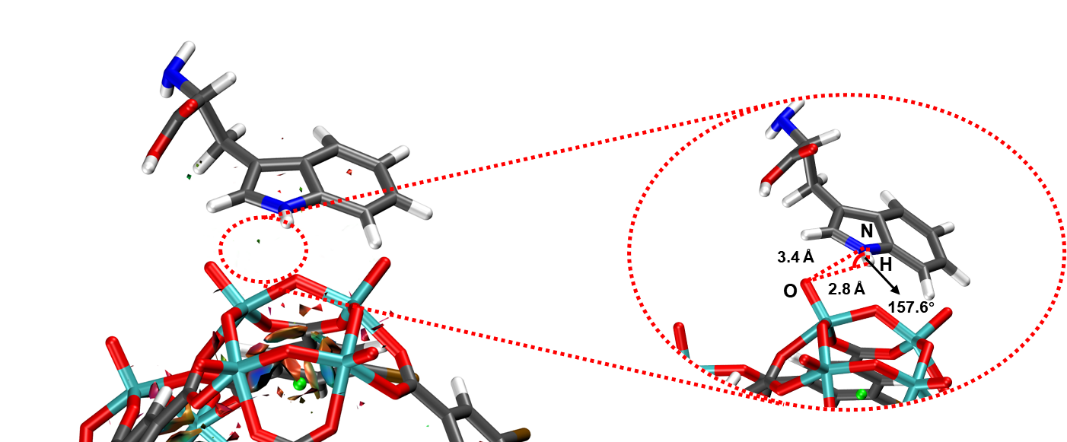


**Supplementary Fig. 19** TheweakN-H…O hydrogen bond between between the nitrogen atom in the indole ring and oxygen atom in the polyoxovanadate.


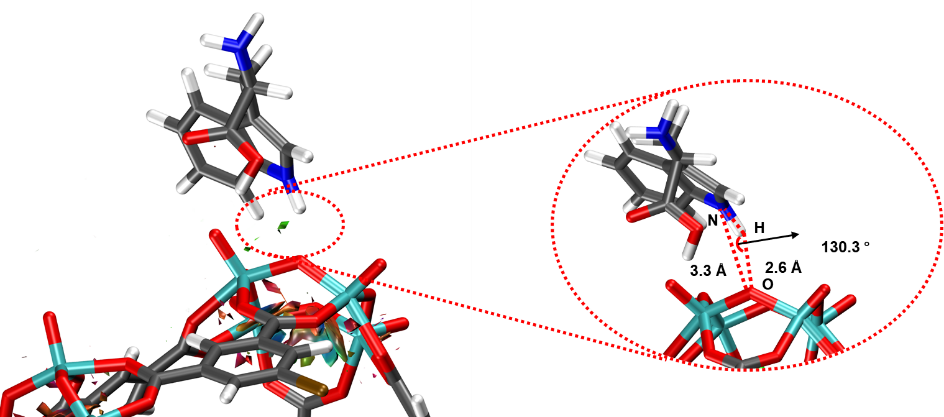


**Supplementary Fig. 20** TheweakN-H…O hydrogen bond between between the nitrogen atom in the indole ring and oxygen atom in the polyoxovanadate.


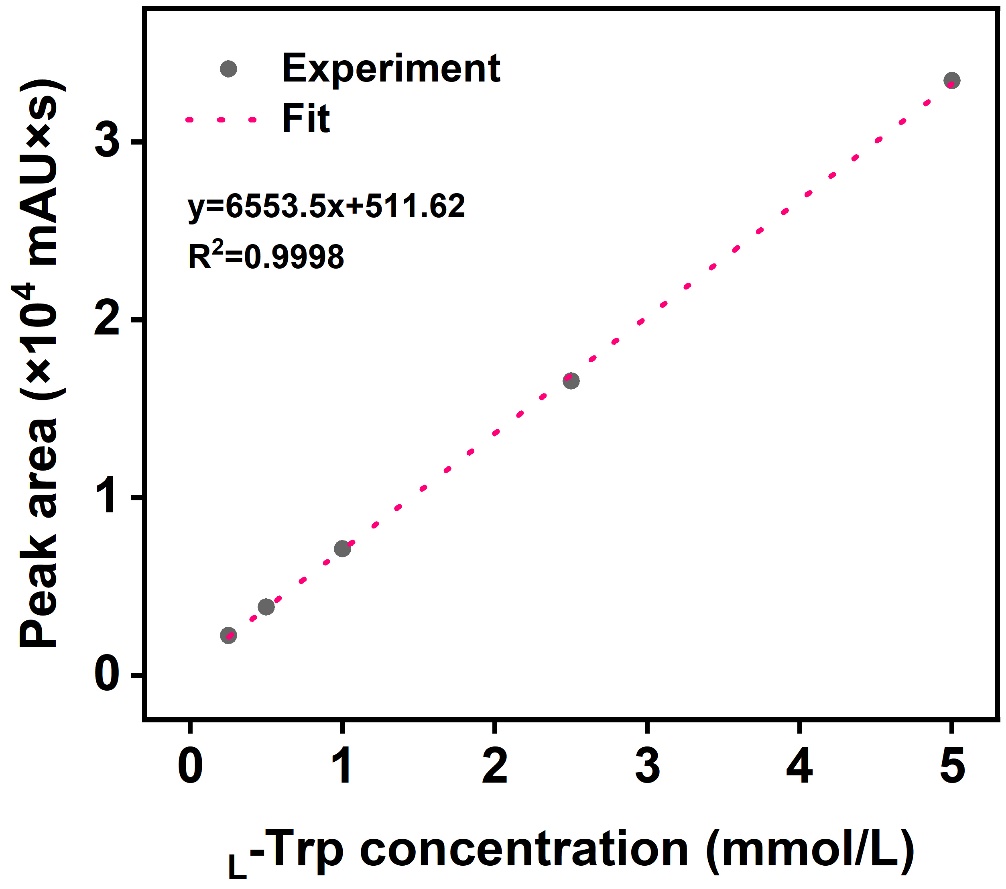


**Supplementary Fig. 21** Calibration curve for the determination of L-Trp.


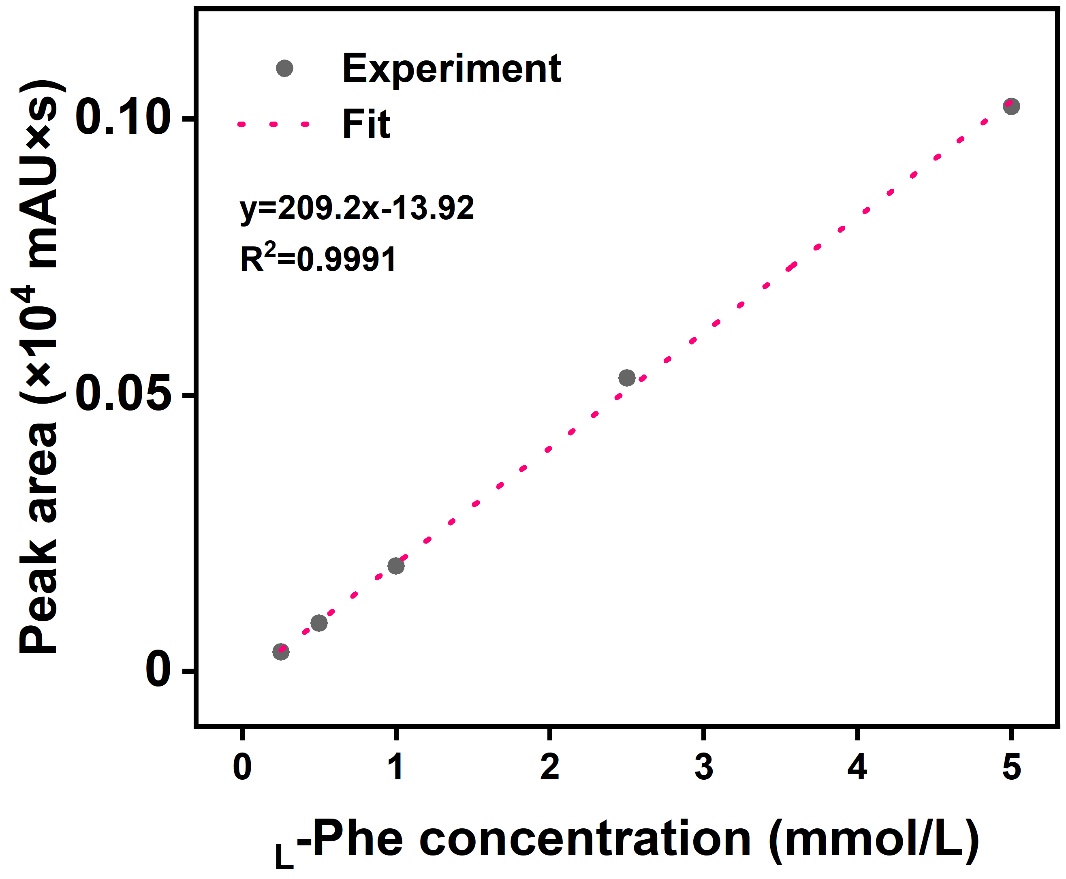


**Supplementary Fig. 22** Calibration curve for the determination of L-Phe.


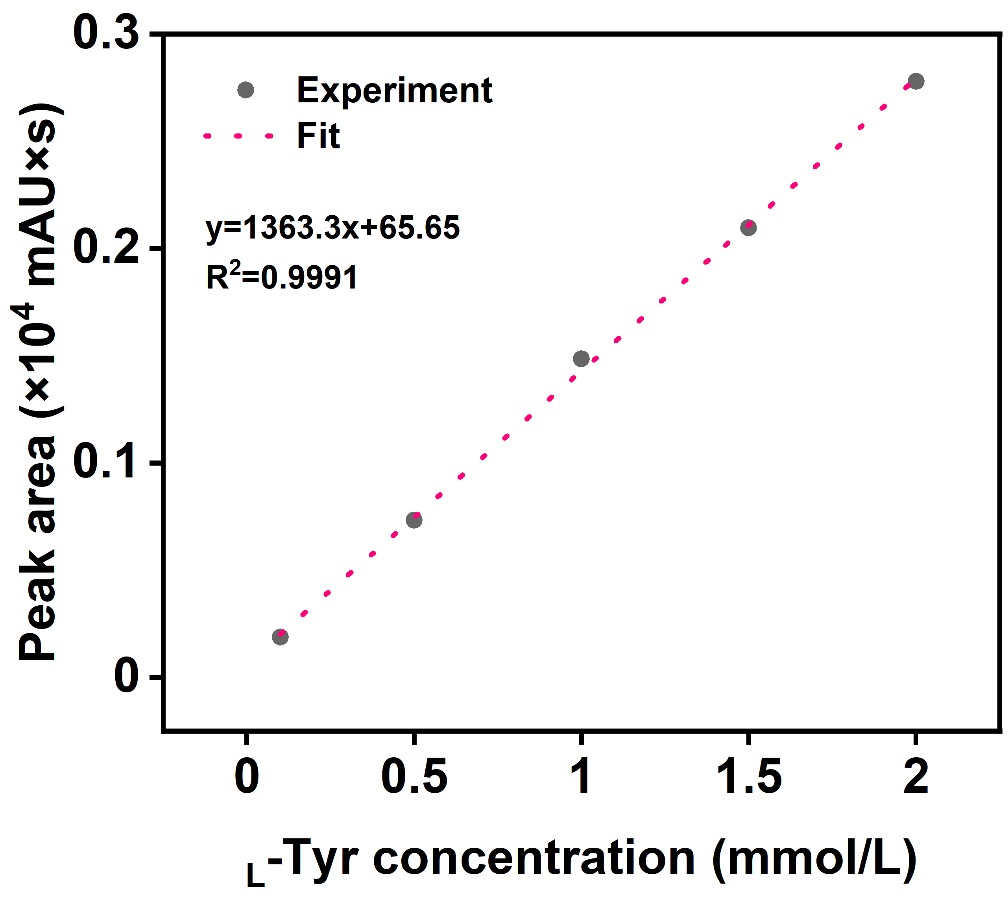


**Supplementary Fig. 23** Calibration curve for the determination of L-Tyr.


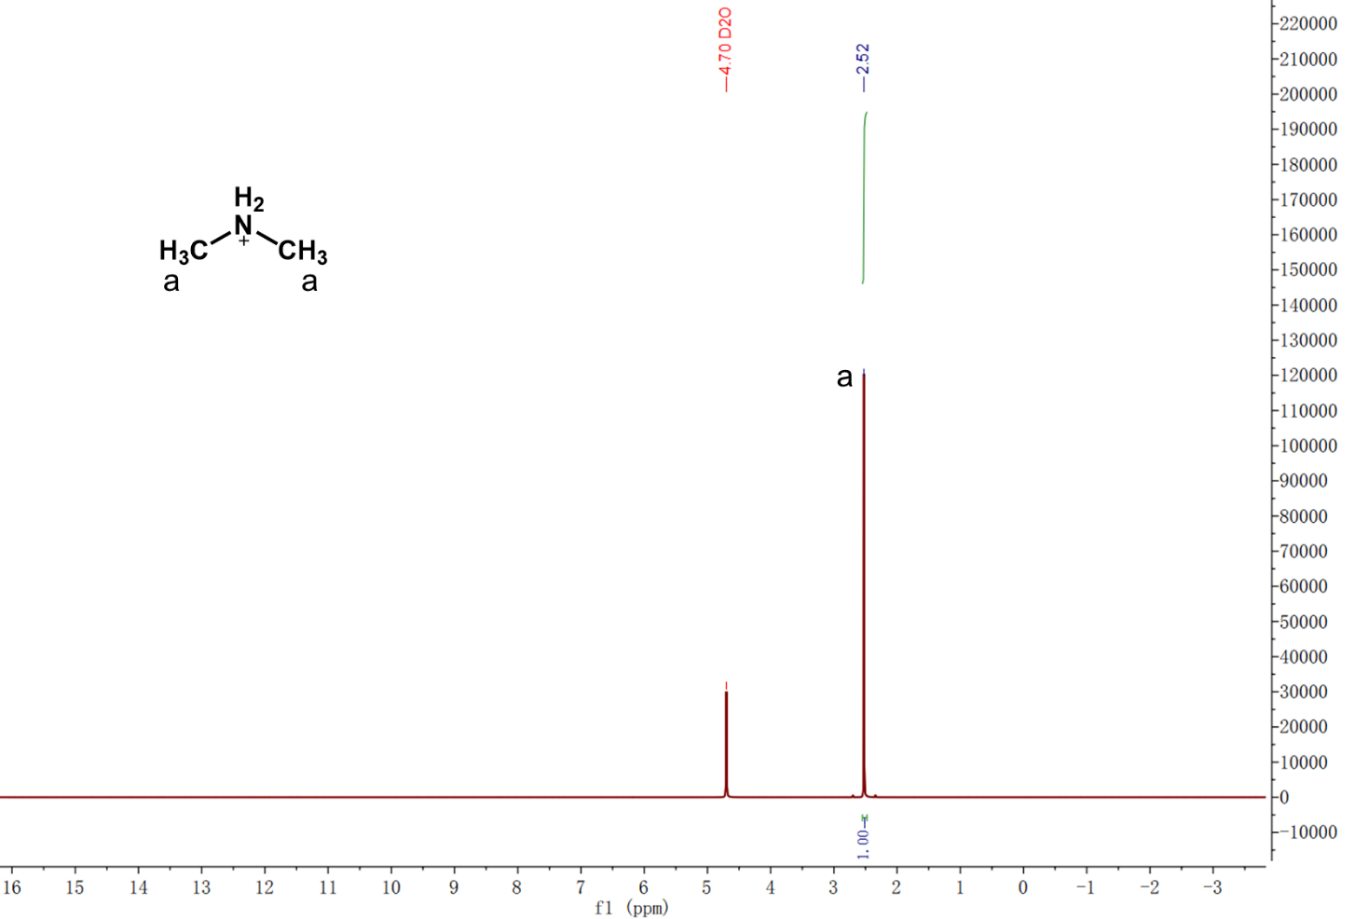


**Supplementary Fig. 24** 1H NMR of the white precipitate (D2O, 400 MHz, 298 K).

**Supplementary Table 1** RMSD values obtained from the MD simulations.

| System | RMSD (nm) |
| --- | --- |
| L-Trp simulation system | 3.38 ± 0.043 |
| L-Phe simulation system | 4.66 ± 0.035 |
| L-Tyr simulation system | 4.43 ± 0.050 |
